# Supplementary material
Source: PubMed Central journal article supplement (PMC3578372)
Supplement: Supp_Data.pdf [file Supp_Data.pdf]

## Supplementary Data

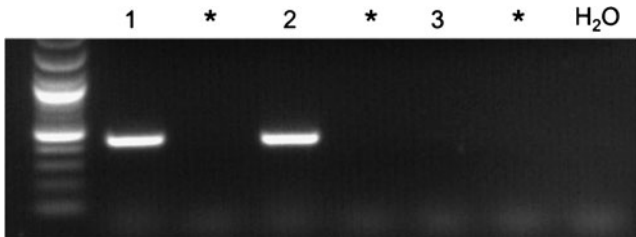

**SUPPLEMENTARY FIG. S1.** Reverse transcription-polymerase chain reaction analysis for GAPDH (450 bp) in human bone marrow-mesenchymal stem cells (BM-MSC) and their exosomes, treated or not with RNase A. Lane 1: hBM-MSC; lane 2: intact exosomes; lane 3: RNase A-treated exosomes. \* indicates RT- samples.
